# Supplementary material for: Trends in the Use of Cardiac Imaging for Patients With Heart Failure in Canada
Source: PubMed Central journal article supplement (PMC6692835; doi:10.1001/jamanetworkopen.2019.8766), 2019-08-09

## Supplementary Online Content

Braga JR, Leong-Poi H, Rac VE, Austin PC, Ross HJ, Lee DS. Trends in the use of cardiac imaging for patients with heart failure in Canada. *JAMA Netw Open*. 2019;2(8):e198766. doi:10.1001/jamanetworkopen.2019.8766

**eTable 1.** Codes Used to Identify a Diagnosis of Heart Failure Using Administrative Databases

**eTable 2.** Recommendations for the Use of Cardiac Imaging Modalities Among Patients With Heart Failure According to the 2013 American Guidelines

**eTable 3.** Codes Used to Identify Modalities of Cardiac Imaging Using Administrative Databases

**eTable 4.** Comparison of Baseline Characteristics Between Prevalent Patients in the Fiscal Years of 2002 and 2016

**eTable 5.** Population of Ontario and Total and New Cases of Heart Failure per Fiscal Year, 2002-2016

**eTable 6.** Number of Exams Performed Among Individuals With HF in Ontario per Fiscal Year, 2002-2016

**eTable 7.** Results for the Segmented Linear Regression Analysis Examining the Age-Sex- Standardized Utilization Rate of Rest Echocardiography Before and After 2012

**eFigure 1.** Traditional:Advanced Cardiac Imaging Modalities Ratio, 2009-2016

**eFigure 2.** Age- and Sex-Standardized Utilization of Rest Echocardiography Among Individuals With Incident Heart Failure, 2002-2016

**eFigure 3.** Age- and Sex-Standardized Utilization of Other Cardiac Imaging Modalities Among Individuals With Incident Heart Failure, 2002-2016

**eFigure 4.** Age- and Sex-Standardized Utilization of Rest Echocardiography Among Prevalent Cases of Heart Failure According to the Place of Living, 2002-2016

**eFigure 5.** Age- and Sex-Standardized Utilization of Traditional Cardiac Imaging Modalities Among Prevalent Cases of Heart Failure According to the Place of Living, 2002-2016

**eFigure 6.** Age- and Sex-Standardized Utilization of Advanced Cardiac Imaging Modalities Among Prevalent Cases of Heart Failure According to the Place of Living, 2002-2016

This supplementary material has been provided by the authors to give readers additional information about their work.

**eTable 1.** Codes Used to Identify a Diagnosis of Heart Failure Using Administrative Databases

| <b>Condition</b>     | <b>Codes</b>                                                                                                                                                   |
|----------------------|----------------------------------------------------------------------------------------------------------------------------------------------------------------|
| <b>Heart failure</b> | ICD-9-CM codes 428, 414.8, 422, 425, 429, 402.9 plus 428, and 404.9 plus 428 and ICD-10CA codes I50, I25.5, I40, I41, I42, I43, I11 plus I50, and I13 plus I50 |

ICD-9-CM: International Classification of Diseases Ninth Revision Clinical Modification; ICD-10-CA: International Classification of Diseases Tenth Revision Canadian enhanced version.

**eTable 2.** Recommendations for the use of cardiac imaging modalities among patients with heart failure according to the 2013 American guidelines

| Level | Class | Recommendation                                                                                                                                                                                                                                                                                                                                                                     |
|-------|-------|------------------------------------------------------------------------------------------------------------------------------------------------------------------------------------------------------------------------------------------------------------------------------------------------------------------------------------------------------------------------------------|
| I     | C     | An echocardiogram should be performed during initial evaluation of patients presenting with HF to assess ventricular function, size, wall thickness, wall motion, and valve function.                                                                                                                                                                                              |
|       | C     | Repeat measurement of LVEF and measurement of structural remodeling are useful to provide information in patients with HF who have had a significant change in clinical status; who have experienced or recovered from a clinical event; or who have received treatment that might have had a significant effect on cardiac function; or who may be candidates for device therapy. |
| IIa   | B     | Viability assessment is reasonable in select situations when planning revascularization in HF patients with CAD.                                                                                                                                                                                                                                                                   |
|       | B     | CMRI is reasonable when assessing myocardial infiltrative processes or scar burden.                                                                                                                                                                                                                                                                                                |
|       | C     | Non-invasive imaging to detect myocardial ischemia and viability is reasonable in patients presenting with <i>de novo</i> HF who have known CAD and no angina unless the patient is not eligible for revascularization of any kind.                                                                                                                                                |
|       | C     | Radionuclide ventriculography or CMR can be useful to assess LVEF and volume when echocardiography is inadequate.                                                                                                                                                                                                                                                                  |
|       | C     | When ischemia may be contributing to HF, coronary arteriography is reasonable for patients eligible for revascularization.                                                                                                                                                                                                                                                         |

CAD: coronary artery disease; CMRI: cardiac resonance imaging; HF: heart failure; LVEF: left ventricular ejection fraction.

Source: Yancy *et al.* 2013 ACCF/AHA guideline for the management of heart failure.

**eTable 3.** Codes Used to Identify Modalities of Cardiac Imaging Using Administrative Databases

| <b>Modality</b>                                 | <b>Codes</b>                                                                          |
|-------------------------------------------------|---------------------------------------------------------------------------------------|
| <b>Rest echocardiography</b>                    | G561, G562, G567, G568, G571, G572, and G575 <sup>a</sup>                             |
| <b>Myocardial perfusion scintigraphy</b>        | J607, J608, J609, J666, J807, J808, J809, and J866 <sup>b</sup>                       |
| <b>Cardiac magnetic resonance imaging</b>       | Combination of code X441 for thorax MRI and code X486 for cardiac gating <sup>c</sup> |
| <b>Cardiac positron emission tomography</b>     | J707, J708                                                                            |
| <b>Coronary computed tomography angiography</b> | X235                                                                                  |
| <b>Stress echocardiography</b>                  | G583 and G584                                                                         |
| <b>Invasive coronary angiography</b>            | CCP codes 489.4 to 489.8, 499.6 and 499.7 and CCI code 3.IP.10                        |

CCP: Canadian Classification of Diagnostic, Therapeutic, and Surgical Procedures; CCI: Canadian Classification of Health Interventions

a: Codes for rest echocardiography refer to all cardiac ultrasound imaging techniques, including M-mode, 2- and 3-dimensional imaging, and color Doppler.

b: Myocardial perfusion scintigraphy included exercise or pharmacological myocardial perfusion imaging with or without single photon emission computer tomography using either sestamibi or thallium as its radiotracer). Given that perfusion imaging tests may be conducted over 1 or more consecutive days, we applied a 2-day window on either side of the date of a scintigraphy claim to avoid duplicate counting.

c: This combination has been previously validated to identify receipt of cardiac magnetic resonance imaging. Roifman et al. Validation of billing code combinations to identify cardiac magnetic resonance imaging scans in Ontario, Canada. *BMJ Open*, In press.

**eTable 4.** Comparison of Baseline Characteristics Between Prevalent Patients in the Fiscal Years of 2002 and 2016

| <b>Variable</b>                                           | <b>2002<br/>(N=243,882)</b> | <b>2016<br/>(N=307,023)</b> | <b>P-<br/>value</b> |
|-----------------------------------------------------------|-----------------------------|-----------------------------|---------------------|
| <b>Age, yrs, median (25<sup>th</sup>-75<sup>th</sup>)</b> | 76 (67-83)                  | 76 (66-85)                  | <.001               |
| <b>Female sex, n (%)</b>                                  | 124,624 (51.1)              | 146,757 (47.8)              | <.001               |
| <b>Rural residence, n (%)</b>                             | 42,680 (17.5)               | 40,527 (13.2)               | <.001               |
| <b>Medical history, n (%)</b>                             |                             |                             |                     |
| Atrial fibrillation/flutter                               | 51,460 (21.1)               | 68,159 (22.2)               | <.001               |
| Cancer                                                    | 20,974 (8.6)                | 27,325 (8.9)                | <.001               |
| Chronic kidney disease                                    | 24,632 (10.1)               | 62,326 (20.3)               | <.001               |
| COPD                                                      | 46,338 (19.0)               | 44,211 (14.4)               | <.001               |
| Dementia                                                  | 17,803 (7.3)                | 31,009 (10.1)               | <.001               |
| Depression                                                | 16,096 (6.6)                | 17,807 (5.8)                | <.001               |
| Diabetes                                                  | 64,629 (26.5)               | 104,080 (33.9)              | <.001               |
| Hypertension                                              | 135,355 (55.5)              | 168,862 (55.0)              | <.001               |
| Liver cirrhosis                                           | 3,171 (1.3)                 | 6,755 (2.2)                 | <.001               |
| Previous AMI                                              | 37,556 (15.4)               | 30,702 (10.0)               | <.001               |
| Previous HF hospitalization                               | 99,016 (40.6)               | 91,800 (29.9)               | <.001               |
| Peripheral vascular disease                               | 24,632 (10.1)               | 14,737 (4.8)                | <.001               |
| Stroke                                                    | 35,363 (14.5)               | 29,474 (9.6)                | <.001               |

AMI: acute myocardial infarction; COPD: chronic obstructive pulmonary disease; HF: heart failure; N: number; yrs: years of age.

**eTable 5.** Population of Ontario and Total and New Cases of Heart Failure per Fiscal Year, 2002-2016

| <b>Fiscal Year</b> | <b>Ontario population*</b> | <b>Total cases of HF</b> | <b>New cases of HF</b> |
|--------------------|----------------------------|--------------------------|------------------------|
| <b>2002</b>        | 8,961,237                  | 243,882                  | 38,560                 |
| <b>2003</b>        | 9,112,530                  | 248,036                  | 36,765                 |
| <b>2004</b>        | 9,258,879                  | 251,424                  | 36,082                 |
| <b>2005</b>        | 9,398,756                  | 255,176                  | 35,994                 |
| <b>2006</b>        | 9,533,217                  | 259,007                  | 35,499                 |
| <b>2007</b>        | 9,646,382                  | 261,772                  | 34,862                 |
| <b>2008</b>        | 9,764,732                  | 265,253                  | 36,348                 |
| <b>2009</b>        | 9,884,030                  | 268,812                  | 35,467                 |
| <b>2010</b>        | 10,026,231                 | 273,538                  | 35,821                 |
| <b>2011</b>        | 10,160,334                 | 277,491                  | 35,700                 |
| <b>2012</b>        | 10,328,123                 | 283,240                  | 36,731                 |
| <b>2013</b>        | 10,485,643                 | 289,699                  | 38,513                 |
| <b>2014</b>        | 10,628,572                 | 296,176                  | 40,668                 |
| <b>2015</b>        | 10,753,893                 | 300,276                  | 38,839                 |
| <b>2016</b>        | 10,929,424                 | 307,023                  | 39,754                 |

\* Older than 20 years of age.

HF: heart failure.

**eTable 6.** Number of Exams Performed Among Individuals With HF in Ontario per Fiscal Year, 2002-2016

| <b>Fiscal Year</b> | <b>Rest echo</b> | <b>MPS</b> | <b>ICA</b> | <b>Stress echo</b> | <b>CCTA</b> | <b>CMRI</b> | <b>CPET</b> |
|--------------------|------------------|------------|------------|--------------------|-------------|-------------|-------------|
| <b>2002</b>        | 63,362           | 15,176     | 11,976     | -                  | -           | 93          | -           |
| <b>2003</b>        | 64,403           | 15,815     | 12,417     | -                  | -           | 76          | -           |
| <b>2004</b>        | 70,212           | 17,121     | 13,565     | -                  | -           | 104         | -           |
| <b>2005</b>        | 76,516           | 18,634     | 14,612     | -                  | -           | 127         | -           |
| <b>2006</b>        | 81,772           | 19,639     | 14,797     | -                  | -           | 125         | -           |
| <b>2007</b>        | 85,692           | 20,100     | 14,870     | -                  | -           | 236         | -           |
| <b>2008</b>        | 93,772           | 21,854     | 16,164     | -                  | -           | 505         | -           |
| <b>2009</b>        | 99,102           | 21,647     | 17,003     | -                  | -           | 651         | 35          |
| <b>2010</b>        | 104,970          | 22,201     | 17,763     | -                  | -           | 798         | 70          |
| <b>2011</b>        | 111,055          | 23,798     | 17,834     | 1804               | 681         | 923         | 102         |
| <b>2012</b>        | 107,222          | 23,024     | 18,622     | 3708               | 885         | 1159        | 146         |
| <b>2013</b>        | 114,525          | 24,333     | 19,590     | 3916               | 1187        | 1277        | 175         |
| <b>2014</b>        | 122,817          | 24,918     | 20,076     | 4617               | 1395        | 1601        | 160         |
| <b>2015</b>        | 126,385          | 26,329     | 20,133     | 4938               | 1631        | 1770        | 125         |
| <b>2016</b>        | 129,009          | 27,038     | 20,436     | 5555               | 1760        | 1862        | 129         |

The claims code for CPET were introduced in 2009, while the codes for CCTA and stress echocardiography were introduced in 2011.

-: empty cell; CCTA: coronary computed tomography angiography; CMRI: cardiac magnetic resonance imaging; CPET: cardiac positron emission tomography; ICA: invasive coronary angiography; MPS: myocardial perfusion scintigraphy.

**eTable 7.** Results for the Segmented Linear Regression Analysis Examining the Age- Sex- Standardized Utilization Rate of Rest Echocardiography Before and After 2012

| <b>Parameter</b>       | <b>Coefficient</b> | <b>Standard error</b> | <b>t value</b> | <b>P-value</b> |
|------------------------|--------------------|-----------------------|----------------|----------------|
| Intercept              | 367.5              | 8.5895                | 42.78          | <.001          |
| Pre-intervention slope | 18.5               | 1.4                   | 13.36          | <.001          |
| Change in intercept    | -59.5              | 13.0                  | -4.58          | <.001          |
| Change in slope        | -16.8              | 4.2                   | -3.99          | 0.002          |



eFigure 1. Traditional:Advanced Cardiac Imaging Modalities Ratio, 2009-2016

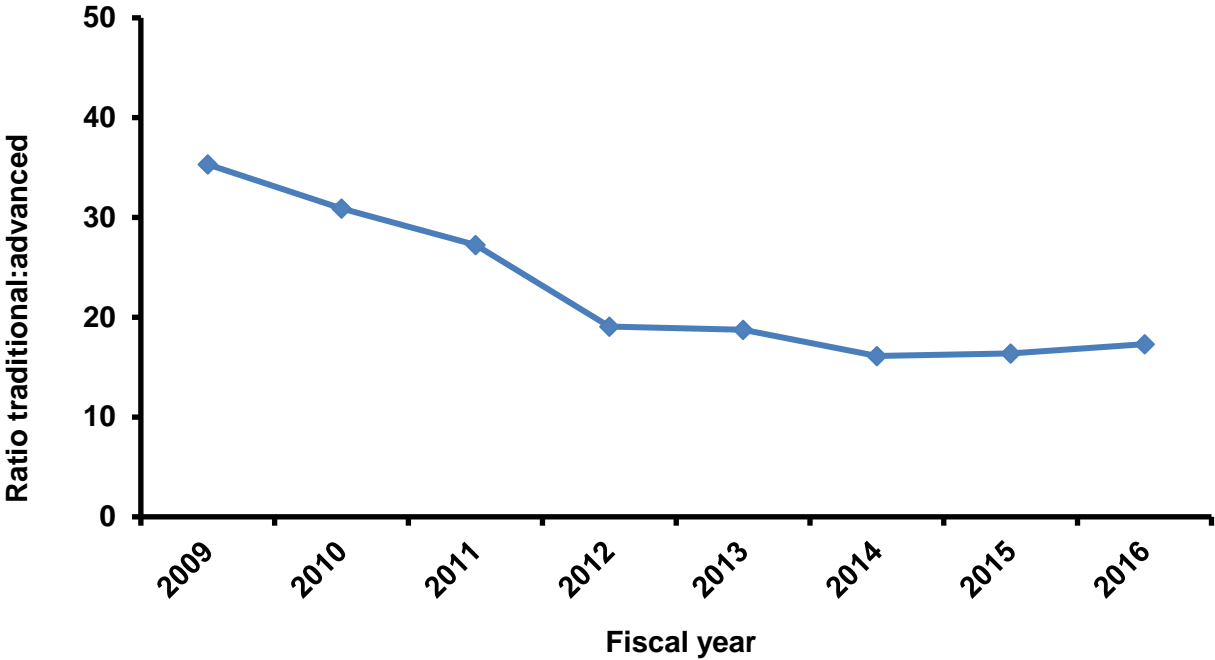

**eFigure 2.** Age- and Sex-Standardized Utilization of Rest Echocardiography Among Individuals With Incident Heart Failure, 2002-2016

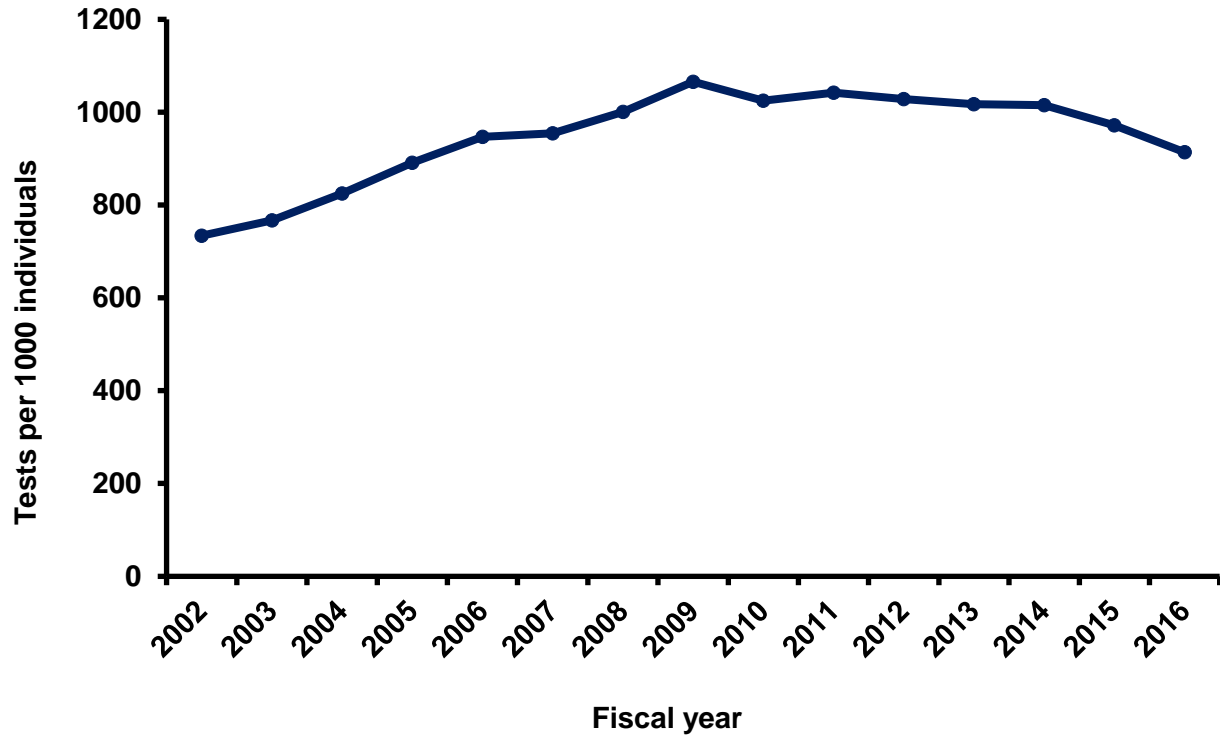

**eFigure 3.** Age- and Sex-Standardized Utilization of Other Cardiac Imaging Modalities Among Individuals With Incident Heart Failure, 2002-2016

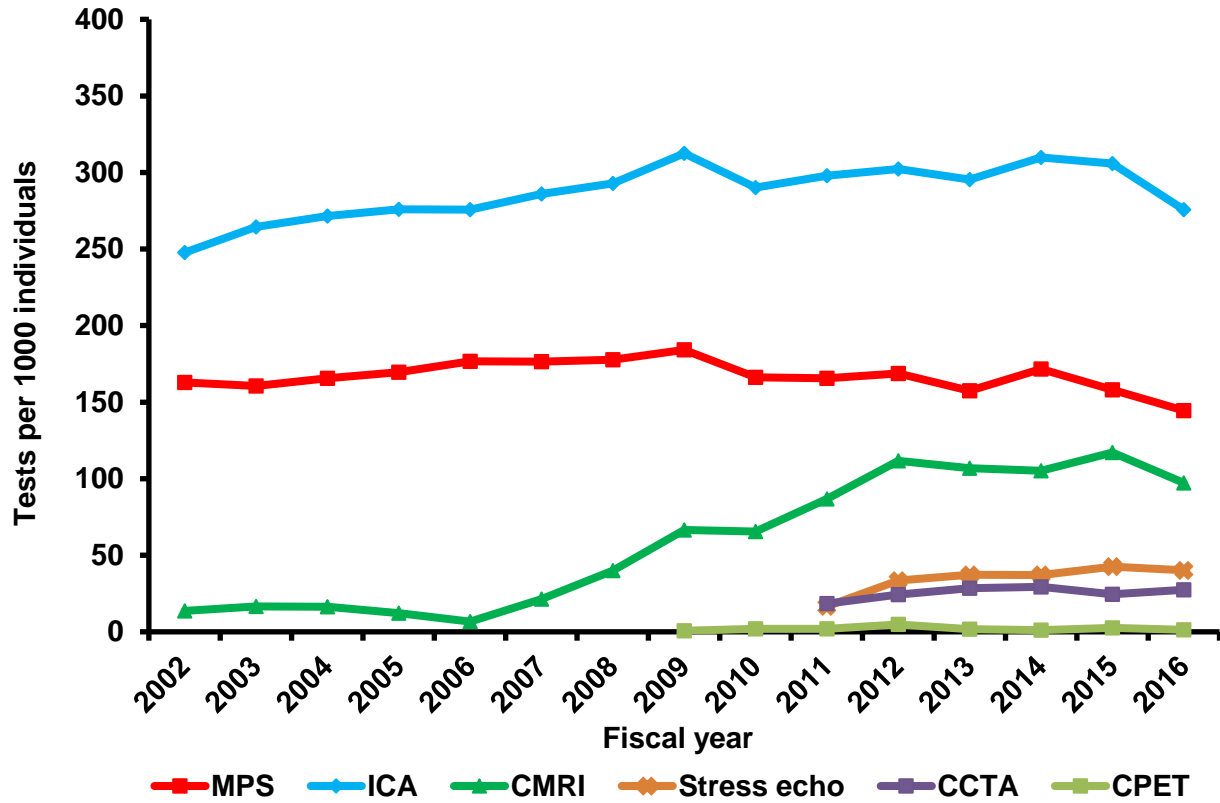

**eFigure 4.** Age- and Sex-Standardized Utilization of Rest Echocardiography Among Prevalent Cases of Heart Failure According to the Place of Living, 2002-2016

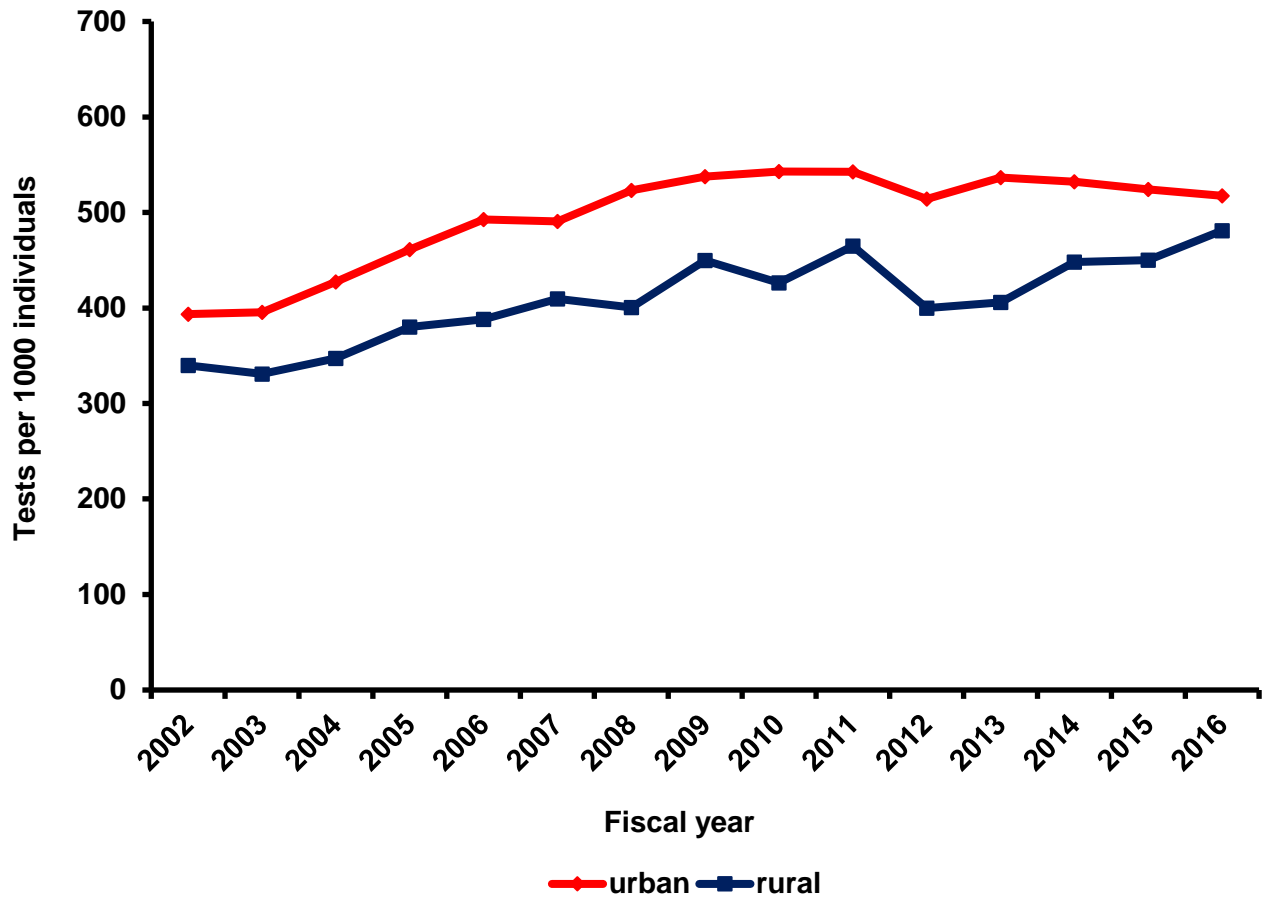

**eFigure 5.** Age- and Sex-Standardized Utilization of Traditional Cardiac Imaging Modalities Among Prevalent Cases of Heart Failure According to the Place of Living, 2002-2016

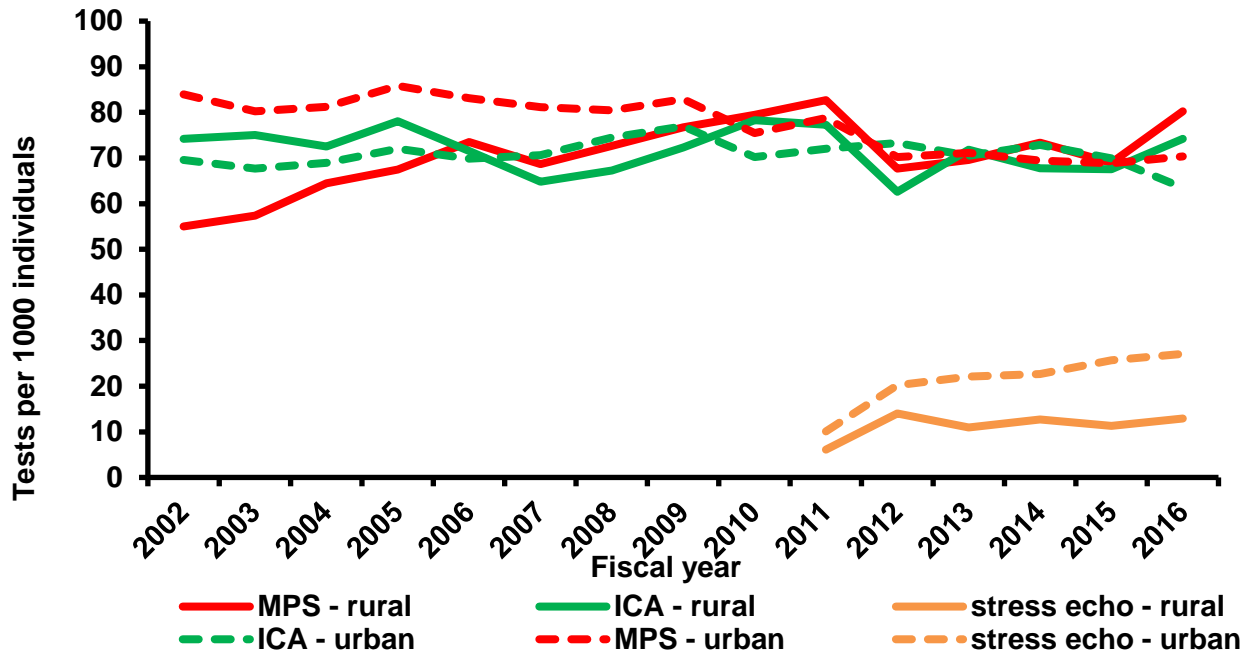

**eFigure 6.** Age- and Sex-Standardized Utilization of Advanced Cardiac Imaging Modalities Among Prevalent Cases of Heart Failure According to the Place of Living, 2002-2016

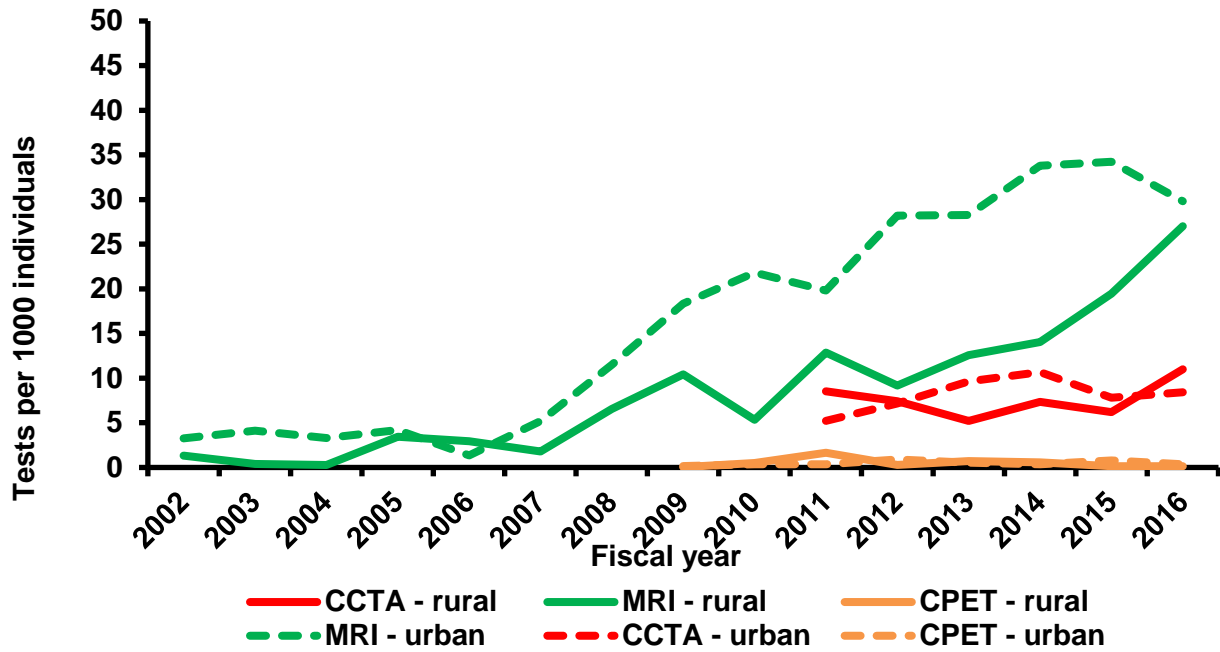

Supplement: jamanetwopen-2-e198766-s001.pdf [file jamanetwopen-2-e198766-s001.pdf]
